1 **AGE DEPENDENT EFFECTS OF PROTEIN RESTRICTION ON DOPAMINE**  
2 **RELEASE**

3

4 **Authors:** Fabien Naneix<sup>a,b</sup>, Kate Z. Peters<sup>c</sup>, Andrew M. J. Young<sup>a</sup>, James E. McCutcheon<sup>a,d</sup>

5

6 a Dept. of Neuroscience, Psychology & Behaviour, University of Leicester, UK

7 b The Rowett Institute, University of Aberdeen, UK

8 c Dept. of Anatomy and Neurobiology, University of Maryland School of Medicine, Baltimore,  
9 MD, USA

10 d Dept. of Psychology, UiT The Arctic University of Norway, Tromsø, Norway

11

12 Corresponding author: Fabien Naneix (fabien.naneix@abdn.ac.uk; @FabNaneix)

13

14 Number of figures: 5 / 2 Supplementary Tables and 1 Supplementary Figure

15 Word counts: Abstract 205 / Introduction 448 / Methods 885 / Results 1446 / Discussion 1403

16

17 **ABSTRACT**

18 Despite the essential role of protein intake for health and development, very little is known  
19 about the impact of protein restriction on neurobiological functions, especially at different  
20 stages of the lifespan. The dopamine system is a central actor in the integration of food-related  
21 processes and is influenced by physiological state and food-related signals. Moreover, it is  
22 highly sensitive to dietary effects during early life periods such as adolescence due to its late  
23 maturation. In the present study, we investigated the impact of protein restriction either during  
24 adolescence or adulthood on the function of the mesolimbic (nucleus accumbens) and  
25 nigrostriatal (dorsal striatum) dopamine pathways using fast-scan cyclic voltammetry in rat  
26 brain slices. In the nucleus accumbens, protein restriction in adults increased dopamine  
27 release in response to low and high frequency trains of stimulation (1-20 Hz). By contrast,  
28 protein restriction performed at adolescence decreased nucleus accumbens dopamine  
29 release. In the dorsal striatum, protein restriction has no impact on dopamine release when  
30 performed at adulthood but in adolescent rats we observed frequency-dependent increases  
31 in stimulated dopamine release. Taken together, our results highlight the sensitivity of the  
32 different dopamine pathways to the effect of protein restriction, as well as their vulnerability to  
33 deleterious diet effects at different life stages.

34

## 35 INTRODUCTION

36 The regulation of food intake in an ever-changing environment is a central survival process.  
37 Healthy diet requires a balanced intake of the three main macronutrients (carbohydrate, fat,  
38 and protein) [1]. Protein intake is especially important as amino acids are essential for many  
39 biological functions (growth and maintenance, synthesis of nucleic acids and hormones,  
40 immune response, cellular repair) and many amino acids cannot be synthesized *de novo*. In  
41 humans, protein deficiency and a low protein diet are associated with muscle wasting, stunted  
42 growth and increased vulnerability to infections, but may also, to some extent, contribute to  
43 obesity by generally increasing appetite [2–4]. Furthermore, protein deficiency and severe  
44 protein malnutrition are especially detrimental during development and early life when demand  
45 is highest [5–7]. Numerous species, including humans and rodents, regulate their food intake  
46 and food-related behaviors to avoid protein deficiency [8–13]. Increasing evidence implicates  
47 broad hypothalamic and limbic circuits in the regulation of protein appetite [10,13–15].  
48 However, the impact of protein imbalance (high or low protein diet) on the function of these  
49 neurobiological circuits remains undescribed, especially when protein deficiency occurs during  
50 a critical period of early development.

51 The dopamine system plays a central role in food-seeking behaviors, food preference, and in  
52 the motivation to eat [16–19]. Recent data show that dopamine neurons integrate current  
53 physiological state (*i.e.* hunger, nutrient deficiency) to guide food-seeking behaviors [20–23].  
54 Dopamine neurons are especially sensitive to the nutrient content of ingested food [24–28],  
55 through gut-to-brain axis [29,30] and peripheral feeding hormones [31–35]. Furthermore,  
56 exposure to specific diets, such as high-carbohydrate and/or high-fat, impacts dopamine  
57 signaling within the nucleus accumbens (NAc) and the dorsal striatum [36–40]. However, the  
58 impact of low protein diet on the function of dopamine circuits is still largely unexplored.

59 Early life periods like childhood and adolescence are periods of particular vulnerability to the  
60 deleterious impact of various diets on corticolimbic circuits and reward-related processes [41–  
61 47]. Interestingly, the dopamine system undergoes delayed maturation taking place during  
62 adolescence making it vulnerable to external insults [47–54]. The impact of prolonged  
63 inadequate protein consumption on dopamine signaling remains unknown but may be  
64 exacerbated during adolescence when protein demand is increased to support rapid growth  
65 [55].

66 Here, we investigated the impact of protein restriction either during adolescence or adulthood  
67 on the function of the mesolimbic (NAc) and nigrostriatal (dorsal striatum) dopamine pathways  
68 using fast-scan cyclic voltammetry (FSCV) in rat brain slices. We found that protein restriction  
69 induced opposite effects on NAc dopamine release depending on age, with restriction

70 increasing dopamine release in adults but decreasing it in adolescents. In the dorsal striatum,  
71 however, dopamine function following protein restriction was increased only in adolescents  
72 and not adults.

73

## 74 **MATERIAL AND METHODS**

### 75 ***Subjects***

76 Male Sprague Dawley rats (Charles River Laboratories) were received either at weaning  
77 (approximately P21, 50-70 g) for adolescent groups (n = 13) or at adulthood (P60, 200-250 g)  
78 for Adult groups (n = 15). Rats were housed in groups of 2-3 in individually ventilated cages  
79 (46.2 x 40.3 x 40.4 cm), in a temperature (21 ± 2°C) and humidity (40-50%) controlled  
80 environment with a 12 h light/dark cycle (lights on at 7:00 AM) and with food and water  
81 available *ab libitum*. All testing and tissue harvesting occurred in the light phase. Procedures  
82 were performed in accordance with the Animals (Scientific Procedures) Act 1986 and carried  
83 out under Project License PFACC16E2.

84

### 85 ***Diets***

86 All rats were initially maintained on standard laboratory chow diet (Teklad global #2918,  
87 Envigo) containing 18% protein. One week after arrival rats either continued on standard  
88 laboratory chow diet (Non Restricted group; Adolescents-NR n = 6, Adults-NR n = 8) or were  
89 switched to a modified AIN-93G diet containing 5% protein from casein (#D15100602,  
90 Research Diets; Protein Restricted group: Adolescents-PR n = 7, Adults-PR n = 7;  
91 **Supplemental Table 1**) [11]. Rats had *ad libitum* access to their assigned diet. Protein  
92 restriction was maintained for 12 to 14 days either during adolescence (from P28 to P42) or  
93 during adulthood (> P70). Body weight and food intake were collected daily throughout the  
94 experiments. Tissue was collected for voltammetry recordings immediately after this period  
95 (**Figure 1A**).

96

### 97 ***Slice preparation***

98 Rats were deeply anesthetized with chloral hydrate (400 mg/kg i.p., Sigma-Aldrich),  
99 decapitated, and brains were removed and transferred to ice cold artificial cerebrospinal fluid  
100 (aCSF) containing in mM: 126 NaCl, 10 glucose, 26 NaHCO<sub>3</sub>, 2.5 KCl, 2.4 CaCl<sub>2</sub>, 2 MgCl<sub>2</sub>,  
101 1.4 NaH<sub>2</sub>PO<sub>4</sub>. Acute 300 µm thick coronal slices, containing both the NAc and the dorsal

102 striatum were prepared in ice-cold aCSF buffer using a vibratome (Leica VT1200S). Slices  
 103 were kept at room temperature (20-22°C) in aCSF saturated with 95% O<sub>2</sub> and 5% CO<sub>2</sub> for at  
 104 least 1 h before the start of recordings.

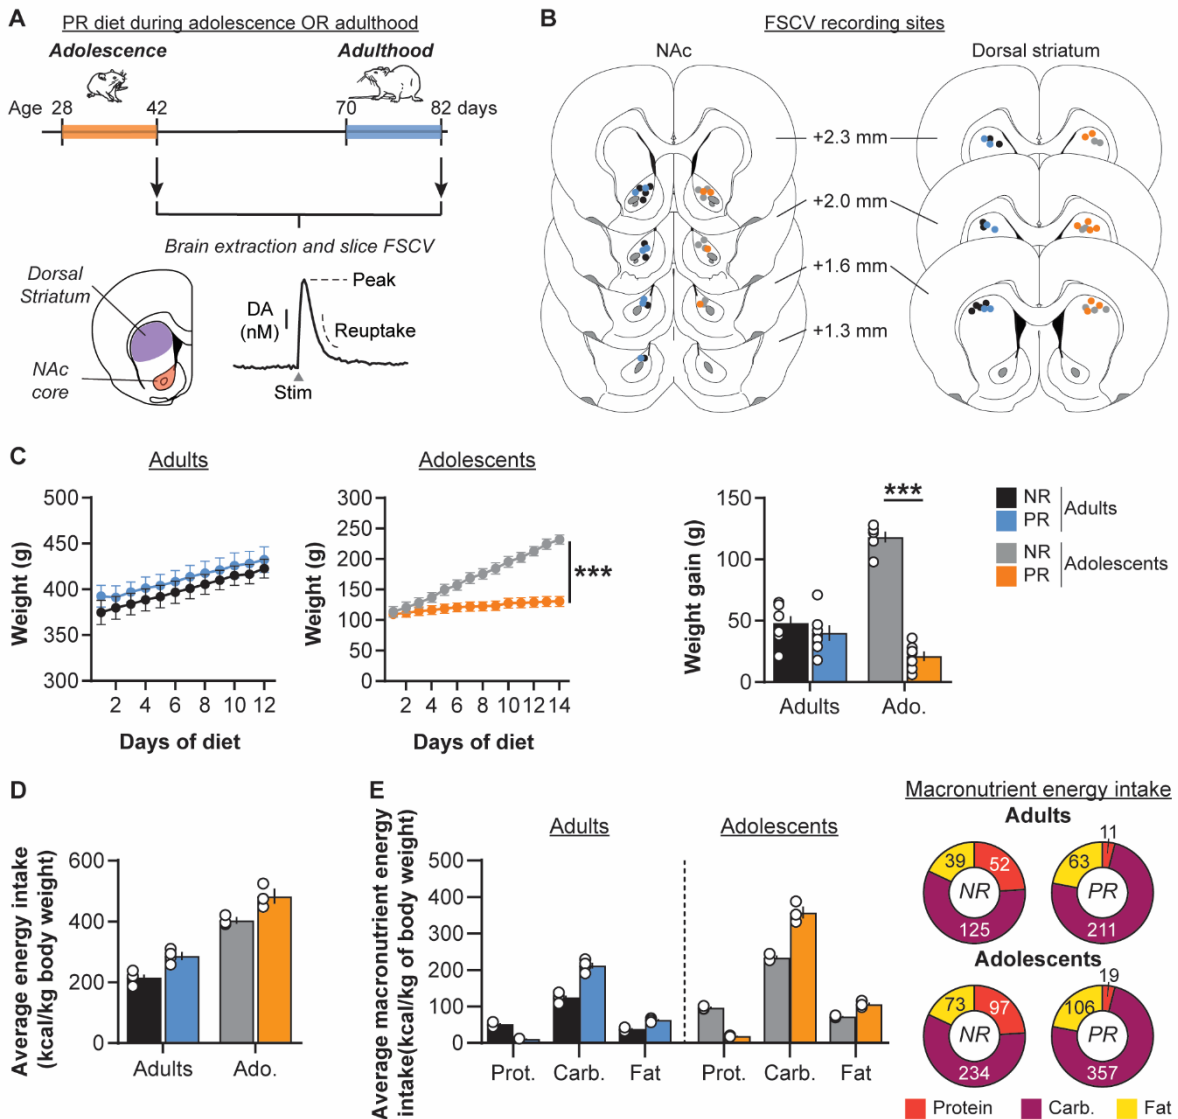

**Figure 1.** (A) Schematic representation of the experimental design. Rats had access to either control chow diet (18% protein; non-restricted, NR) or protein-restricted diet (5% protein; PR) during either adolescence (post-natal day 28 to 42) or adulthood (post-natal-day 70 to 82). At the end of the diet exposure, brains were extracted to perform FSCV recordings of electrically evoked dopamine (DA) release in the NAc and dorsal striatum. (B) Coronal brain sections (modified from [83]) representing the recording sites in the NAc core (left) and the dorsal striatum (right) for NR and PR groups. Numbers indicate the distance from Bregma. (C) Protein restriction during adolescence but not during adulthood altered weight (left and middle) and weight gain (right). (D) Daily energy intake (in kcal/kg of body weight) is higher in adolescent rats compared to adults, and in PR groups compared to control NR groups. (E) Macronutrient breakdown for daily energy intake during the diet exposure (in kcal/kg of body weight). Pie charts represent energy intake from each macronutrient for each diet group (Protein: red; Carbohydrate: purple; Fat: yellow). Adults-NR, n = 8, black symbols; Adults-PR, n = 7, blue symbols; Adolescents-NR, n = 6, grey symbols; Adolescents-PR, n = 7, orange symbols. Data are mean ± SEM and circles show individual (e.g. rats for C and cages for D) data points. \*\*\*  $p < 0.001$  Diet effect (two-way ANOVA followed by Sidak's *post hoc* tests).

105

## 106 **Fast scan cyclic voltammetry recordings**

107 Unilateral slices were transferred to the recording chamber and superfused at 2 ml/min with  
108 aCSF saturated with 95% O<sub>2</sub> and 5% CO<sub>2</sub> at 30°C. Slices were allowed to equilibrate for 30  
109 min prior to recordings. A twisted stainless steel bipolar stimulating electrode (MS303T/2-  
110 B/SPC, P1 Technologies) was placed at the surface of the slice within the NAc core or the  
111 dorsal striatum (**Figure 1B**). A homemade glass capillary carbon-fiber microelectrode (tip  
112 length 50-100 μm) was positioned in the slice approximately 100 μm beneath the tissue  
113 surface and 100-200 μm from the stimulating electrode [56,57]. For FSCV recordings, a  
114 triangular voltage waveform was applied (-0.4 to +1.3 V and back versus an Ag/AgCl reference  
115 electrode; 400 V/s) using a custom-built headstage circuit (University of Washington  
116 Electronics and Materials Engineering Shop, Seattle, WA) and TarHeel voltammetry software  
117 (Chapel Hill, University of North Carolina [58]). The waveform was initially applied at 60 Hz for  
118 10 min, to condition the electrode outside of the tissue, and then applied at 10 Hz while all  
119 experiments were being conducted. Dopamine release was evoked by monopolar stimulation  
120 pulses (0.7 mA, 0.2 ms) [59]. Electrical stimulations were repeated at 3 min intervals to ensure  
121 consistent release. Stimuli were either single pulses (1 p) or trains of five pulses (5 p) at  
122 frequencies ranging from 'tonic' (1, 5 or 10 Hz) to 'phasic' burst frequencies (20 Hz) of  
123 dopamine neurons reported *ex vivo* and *in vivo* [60–62]. Each stimulation was repeated 3  
124 times in pseudo-random order and averaged to obtain the individual value for this frequency.  
125 Each slice yielded an individual recording site.

126 Extracellular dopamine levels ([DA]<sub>o</sub>) were confirmed by examining current-voltage plots  
127 showing oxidation (approximately +0.6 V) and reduction (approximately -0.2 V) peaks using  
128 TarHeel software. Background (non-Faradaic) current was measured for 1 s between 4-5  
129 seconds before the stimulation and subtracted from the signal. Dopamine currents (in nA)  
130 were then converted to dopamine concentration (in nM) using the calibration of each electrode  
131 against a known standard dopamine concentration. [DA]<sub>o</sub> peaks were measured following any  
132 stimulation artefacts within a +0.2 to +0.5 sec time interval following the start of the stimulation,  
133 as previously described [63]. As the electrical stimulations used varied in length and  
134 frequency, we also quantified DA release by using the area under the curve of [DA]<sub>o</sub> (AUC)  
135 following the start of the stimulation. Recording electrodes were calibrated after use using 1-  
136 2 μM dopamine solution in a flow cell system [64] and in the recording chamber.

137

## 138 **Statistical analysis**

139 Weight and food intake measures were analyzed using three- or two-way repeated measures  
140 ANOVAs with Diet (Non Restricted NR, Protein Restricted PR) and Age (Adults, Adolescents)  
141 as between factors and Day or Macronutrient (Protein, Carbohydrate, Fat) as within factors.  
142 As rats were group-housed, food intake data were collected by cage, divided by the number  
143 of rats in the cage, normalized by kg of body weight and expressed as energy intake (kcal/kg  
144 of body weight). Energy intake was also analysed as macronutrient breakdown.

145 For single pulse stimulation,  $[DA]_o$  AUC and clearance times ( $T_{80}$ : time for 80% decay from  
146 peak amplitude;  $T_{20}$ : time for 20% decay from peak amplitude; Half-life: time for 50% decay  
147 from peak amplitude) were analyzed using two-way ANOVAs with Age (Adults, Adolescents)  
148 and Diet (NR, PR) as between-subject factors.  $[DA]_o$  AUC in response to single pulses were  
149 plotted as cumulative probability and compared using Kolmogorov-Smirnov test.  $[DA]_o$  AUC  
150 from frequency-response curves were analyzed using three-way and two-way repeated  
151 measures ANOVA using Age (Adults, Adolescents) and Diet (NR, PR) as between-subject  
152 factors and Frequency (1, 5, 10, 20 Hz) as within-subject factor. 5 p / 1 p  $[DA]_o$  ratios were  
153 calculated by dividing the average  $[DA]_o$  peak value at 20 Hz by the average  $[DA]_o$  peak value  
154 at 1 Hz for the same recording site, and were analyzed using two-way ANOVA with Age  
155 (Adults, Adolescents) and Diet (NR, PR) as between-subject factors. Sidak and Dunnett *post*  
156 *hoc* tests were performed when required.

157 Statistical analyses were conducted using GraphPad Prism 8. All values were expressed as  
158 mean  $\pm$  standard error of the mean (SEM). The alpha risk for the rejection of the null  
159 hypothesis was 0.05.

160 Upon publication, all data analyzed in this paper will be available on Figshare  
161 ([10.25392/leicester.data.c.5008904](https://www.figshare.com/10.25392/leicester.data.c.5008904)).

162

## 163 **RESULTS**

### 164 **Age dependent impact of protein restriction on weight**

165 We first investigated the impact of protein restriction during either adolescence or adulthood  
166 on weight and weight gain (**Figure 1C**). As we previously observed [11], protein restriction at  
167 adulthood did not significantly affect rats' weight (two-way repeated measures ANOVA: Diet,  
168  $F(1,13) = 0.5, p = 0.5$ ; Day,  $F(11, 143) = 85.5, p < 0.001$ ; Diet x Day,  $F(11, 143) = 0.4, p = 1.0$ ).  
169 In contrast, protein restriction during adolescence significantly decreased weight gain, relative  
170 to control diet (Diet,  $F(1,11) = 19.8, p < 0.001$ ; Day,  $F(13, 143) = 478.7, p < 0.001$ ; Diet x Day,  
171  $F(13, 143) = 234.0, p < 0.001$ ). Both NR and PR adult rats exhibited similar low weight gain



172 (48 g ± 6 and 40 g ± 6, respectively). NR adolescent rats showed substantial weight increases  
173 (+118 g ± 4), indicating a normal developmental growth whereas PR rats showed only a  
174 modest increase in their weight (+21 g ± 4; two-way ANOVA: Diet,  $F(1,24) = 23.14$ ,  $p < 0.001$ ;  
175 Age,  $F(1,24) = 97.8$ ,  $p < 0.001$ ; Diet x Age,  $F(1,24) = 70.3$ ,  $p < 0.001$ ; Sidak's *post hoc* tests  $p$   
176 = 0.4 for Adults and  $p < 0.001$  for Adolescents), demonstrating that protein restriction in  
177 adolescence disrupted normal growth.

178 Analysis of the average daily food intake for each cage showed that adolescent rats have a  
179 higher energy intake than adults (in kcal per kg of body weight; two-way ANOVA: Diet,  $F(1,11)$   
180 = 229.8,  $p < 0.001$ ; **Figure 1D**). Moreover, PR groups also exhibited a higher daily energy  
181 intake (Diet,  $F(1,11) = 35.1$ ,  $p < 0.001$ ; Diet x Age,  $F(1,11) = 0.1$ ,  $p = 0.7$ ). A more detailed  
182 analysis of macronutrient breakdown showed that PR groups had an lower energy intake from  
183 protein but an increased intake from carbohydrate and fat (3-way repeated measures ANOVA:  
184 Diet,  $F(1,11) = 35.1$ ,  $p < 0.001$ ; Diet x Macronutrient,  $F(2,22) = 394.7$ ,  $p < 0.001$ ; all Sidak's  
185 *post hoc* tests  $p < 0.05$ ; **Figure 1E** and **Supplementary Table 2**).

186 After two weeks of protein restriction, we then assessed the neurobiological impact of this diet  
187 on dopamine release in both the NAc and the dorsal striatum using *ex vivo* FSCV in brain  
188 slices.

189

## 190 ***Age dependent impact of protein restriction on NAc dopamine release***

### 191 *Single pulse evoked NAc dopamine release*

192 In the NAc, protein restriction had a different impact on dopamine release evoked by single  
193 pulse stimulation depending on the life stage (**Figure 2A-B**; Two-way ANOVA: Age,  $F(1,24) =$   
194  $0.1$ ,  $p = 0.7$ ; Diet,  $F(1,24) = 0.7$ ,  $p = 0.4$ ; Diet x Age,  $F(1,24) = 17.8$ ,  $p < 0.001$ ). Protein  
195 restriction at adulthood induced a significant increase (+167 % ± 49) in NAc dopamine release  
196 in response to single pulse stimulation compared to NR control rats (Sidak's *post hoc* tests  $p$   
197 < 0.01). In contrast, protein restriction during adolescence significantly decreased NAc  
198 dopamine release evoked by single pulse stimulation (**Figure 2A-B**; -44% ± 9;  $p < 0.05$ ).  
199 Further analyses confirmed that protein restriction in adulthood significantly changed the  
200 distribution of [DA]<sub>o</sub> AUC values toward the right, demonstrating a greater proportion of large  
201 dopamine responses to single pulse, compared to control animals (**Figure 2C**; Kolmogorov-  
202 Smirnov test:  $D(13) = 0.7$ ,  $p < 0.05$ ). In adolescents, protein restriction significantly induced a  
203 left-shift of the distribution of [DA]<sub>o</sub> AUC, confirming a reduced dopamine response (**Figure**  
204 **2C**; Kolmogorov-Smirnov test:  $D(11) = 0.8$ ,  $p < 0.05$ ). Importantly, analyses of [DA]<sub>o</sub> peaks  
205 evoked by single pulse confirmed the age-dependent differential effect of the diet (**Figure 2D**;



206 Two-way ANOVA: Age,  $F(1,24) = 1.4$ ,  $p = 0.2$ ; Diet,  $F(1,24) = 0.2$ ,  $p = 0.7$ ; Diet x Age,  $F(1,24)$   
207  $= 7.6$ ,  $p < 0.05$ ), without revealing significant differences in either adults (Sidak's *post hoc* test  
208  $p = 0.1$ ) or adolescent rats (Sidak's *post hoc* test  $p = 0.09$ ). To examine whether the diet-  
209 induced changes in dopamine release were mediated by differences in dopamine reuptake,  
210 we measured the  $T_{80}$  clearance time.  $T_{80}$  was significantly shorter in adolescent groups  
211 compared to adults (**Figure 2E**; Two-way ANOVA: Age,  $F(1,24) = 6.5$ ,  $p < 0.05$ ). However,  
212 protein restriction at adulthood or during adolescence did not seem to significantly change  
213 dopamine clearance (Two-way ANOVA: Diet,  $F(1,24) = 0.1$ ,  $p = 0.7$ ; Diet x Age,  $F(1,24) = 2.7$ ,  
214  $p = 0.1$ ; see also **Supplementary Figure 1**). Thus, it appears that the robust changes to NAc  
215 dopamine release reported as AUC are not driven wholly by either a change to the  $[DA]_o$  peak  
216 amplitude or the time course of dopamine uptake, but likely a combination of both factors.

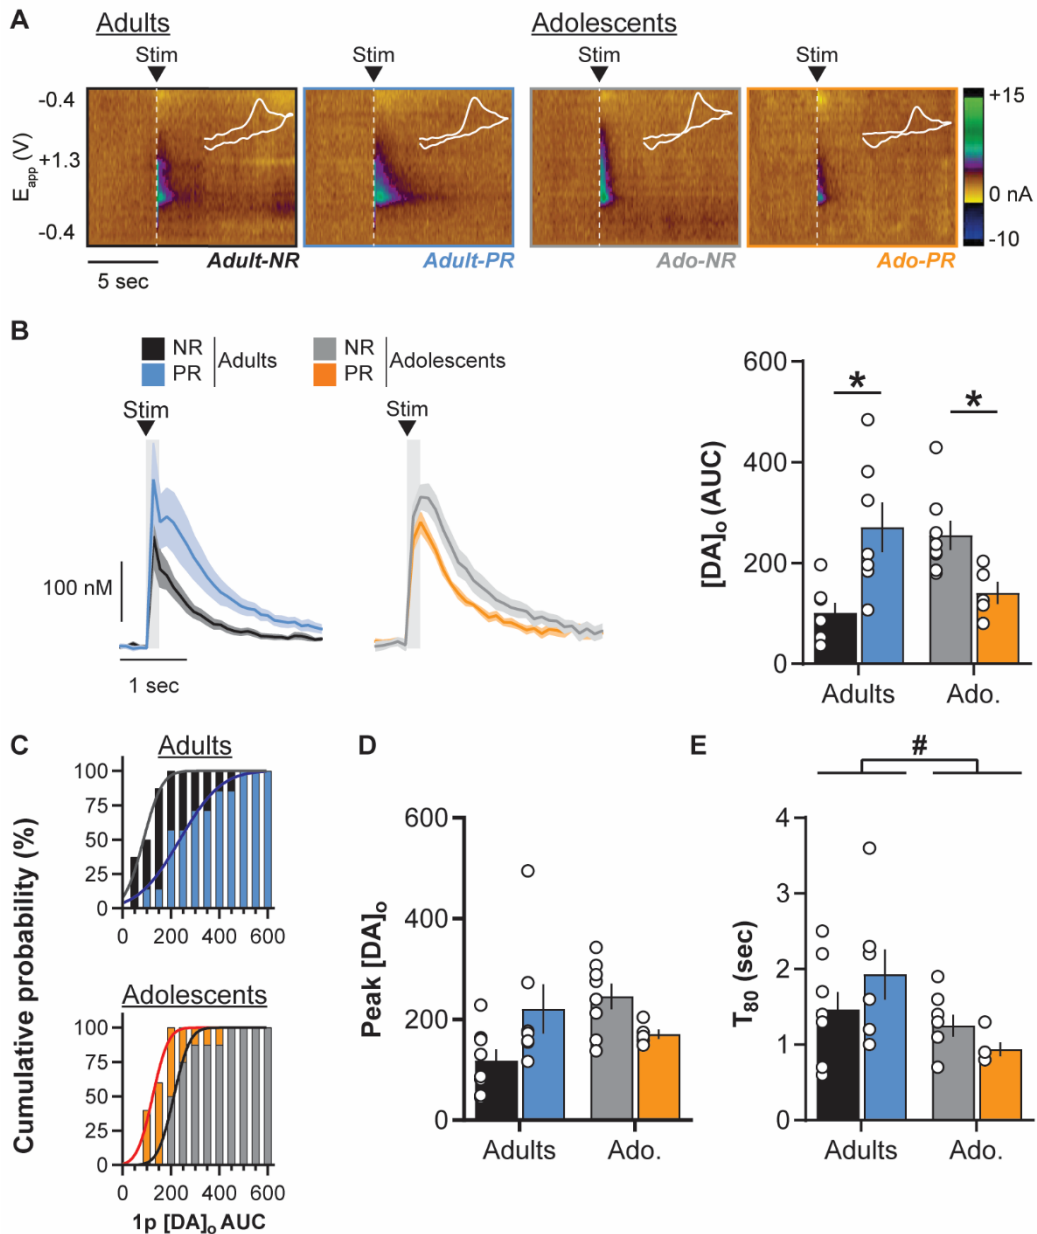

**Figure 2.** Age-dependent impact of protein restriction on NAc dopamine release evoked by single pulse. (A) Representative FSCV color plots for each diet group (non-restricted, NR; protein-restricted, PR) depicting current changes (color) over time (x-axis; in sec) as a function of the recording electrode holding potential (y-axis; -0.4 to +1.3 V and back) in response to single pulse electrical stimulation (0.7 mA, 0.2 ms; vertical white dashed lines). White line insets represent voltammograms for each color plot. (B) *Left:* NAc [DA]<sub>o</sub> versus time (in nM; mean ± SEM) in slices from adult and adolescent NR and PR rats, aligned to the single pulse electrical stimulation (black arrow); *Right:* Mean [DA]<sub>o</sub> release (AUC) evoked by single pulse stimulation in the NAc. (C) Cumulative distribution of single pulse evoked NAc [DA]<sub>o</sub> AUC in adult (*top*) and adolescent (*bottom*) groups. (D) Mean [DA]<sub>o</sub> peak evoked by single pulse stimulation in the NAc. (E) Average T<sub>80</sub> (time for 80% decay from [DA]<sub>o</sub> peak) in the NAc. Adults-NR (black, n = 8), Adults-PR (blue, n = 7), Adolescents-NR (grey, n = 9) and Adolescents-PR (orange, n = 5). Bars show means ± SEM and circles show individual (e.g. recording site) data points. \*  $p < 0.05$  Diet effect (Student's unpaired t-test), #  $p < 0.05$  Age effect (two-way ANOVA).

218 Frequency-dependent NAc dopamine release

219 Dopamine neurons *in vivo* show a range of responses from low-frequency firing (< 10 Hz, *tonic*  
 220 mode) to brief bursts of action potentials at high frequency (15-25 Hz, *phasic* mode) [59–62].  
 221 We therefore investigated the effect of protein restriction on dopamine release at different  
 222 stimulation frequencies ranging from 1 to 20 Hz (1 p = 1 Hz, or 5 p at 5, 10 or 20 Hz). Evoked  
 223 dopamine release increased with the stimulation frequency (**Figure 3A-B**; three-way repeated  
 224 measures ANOVA: Frequency,  $F(3,72) = 39.2$ ,  $p < 0.001$ ) similarly in adolescent and adult  
 225 groups (Age,  $F(1,24) = 3.1$ ,  $p = 0.09$ ). Protein restriction did not affect the frequency-  
 226 dependent effect on dopamine release (Frequency x Diet,  $F(3,72) = 1.6$ ,  $p = 0.2$ ). However,  
 227 protein restriction did differentially affect NAc dopamine release depending on age (Diet,  
 228  $F(1,24) = 1.8$ ,  $p = 0.2$ ; Age x Diet,  $F(1,24) = 13.4$ ,  $p < 0.01$ ; Frequency x Diet x Age,  $F(3,72) =$   
 229  $3.2$ ,  $p < 0.05$ ).

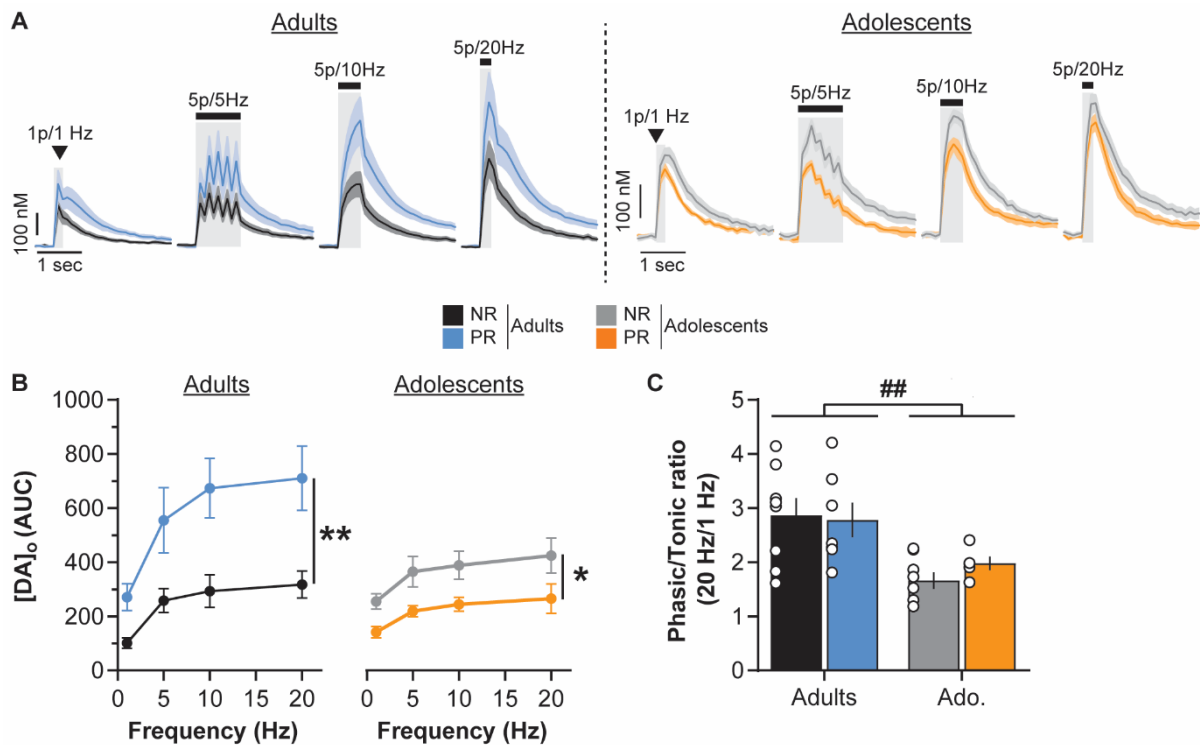

**Figure 3.** Age-dependent impact of protein restriction on frequency-dependent NAc dopamine release. (A) NAc [DA]<sub>0</sub> versus time (in nM, mean ± SEM) for each diet group (non-restricted, NR; protein-restricted, PR) aligned to the electrical stimulation (black symbol) at 1 Hz (single pulse), 5, 10 or 20 Hz (5 pulses; 0.7 mA, 0.2 ms). (B) Protein restriction increased frequency dependent NAc dopamine release (AUC) in adult rats (*left*) but decreased it in adolescent rats (*right*). (C) Protein restriction has no impact on NAc [DA]<sub>0</sub> phasic/tonic ratios. Adults-NR (black, n = 8), Adults-PR (blue, n = 7), Adolescents-NR (grey, n = 9) and Adolescents-PR (orange, n = 5). Bars show means ± SEM and circles show individual (*e.g.* recording site) data points. \*  $p < 0.05$  Diet effect (two-way ANOVA followed by Sidak's *post hoc* tests), ##  $p < 0.01$  Age effect (two-way ANOVA).

230

231 In adult rats, protein restriction increased dopamine release in response to the range of  
 232 stimulation frequencies (two-way repeated measures ANOVA: Diet,  $F(1,13) = 9.3$ ,  $p < 0.01$ ;  
 233 Frequency,  $F(3,39) = 43.6$ ,  $p < 0.001$ ; Diet x Frequency,  $F(3,39) = 5.3$ ,  $p < 0.01$ ; Sidak's *post*  
 234 *hoc* tests: all  $p < 0.05$ ). Conversely, protein restriction during adolescence significantly

235 decreased evoked NAc dopamine release (two-way repeated measures ANOVA: Diet,  $F(1,11)$   
236 = 6.1,  $p < 0.05$ ; Frequency,  $F(3,33) = 6.3$ ,  $p < 0.01$ ; Diet x Frequency,  $F(3, 33) = 0.1$ ,  $p = 0.9$ ).  
237 The relationship between dopamine release during tonic and phasic activity is a central  
238 process in the signaling of significant environmental events and learning [62,65,66]. We  
239 examined whether protein restriction during either adolescence or adulthood affected the  
240 'phasic/tonic ratio' of NAc dopamine release (5 p at 20 Hz / 1 p, **Figure 3C**). Adolescent rats  
241 exhibited a lower ratio than adult rats (Two-way ANOVA: Age,  $F(1,24) = 13.9$ ,  $p < 0.01$ ).  
242 However, protein restriction did not alter this ratio at either age (Diet,  $F(1,24) = 0.2$ ,  $p = 0.7$ ;  
243 Age x Diet,  $F(1,24) = 0.6$ ,  $p = 0.5$ ).

244

## 245 ***Age dependent impact of protein restriction on dorsal striatum dopamine*** 246 ***release***

### 247 *Single pulse evoked striatal dopamine release*

248 In the dorsal striatum, protein restriction had no effect on dopamine release evoked by single  
249 pulse stimulation whether rats were exposed to the diet during adulthood or adolescence  
250 (**Figure 4A-B**; two-way ANOVA: Age,  $F(1,28) = 0.7$ ,  $p = 0.4$ ; Diet,  $F(1,28) = 0.01$ ,  $p = 0.9$ ; Diet  
251 x Age,  $F(1,28) = 1.3$ ,  $p = 0.3$ ), which is also confirmed by the distribution analysis (**Figure 4C**;  
252 Kolmogorov-Smirnov tests: Adult groups,  $D(14) = 0.3$ ,  $p = 0.8$ ; Adolescent groups,  $D(14) =$   
253  $0.6$ ,  $p = 0.1$ ). Moreover, protein restriction also did not significantly affect  $[DA]_o$  peak amplitude  
254 (**Figure 4D**; Two-way ANOVA: Diet,  $F(1,28) = 0.04$ ,  $p = 0.9$ ; Age,  $F(1,28) = 0.08$ ,  $p = 0.8$ , Diet  
255 x Age,  $F(1,28) = 1.4$ ,  $p = 0.2$ ). or dopamine clearance (**Figure 4E**; Two-way ANOVA: Diet,  
256  $F(1,28) = 0.03$ ,  $p = 0.9$ ; Age,  $F(1,28) = 0.9$ ,  $p = 0.4$ , Diet x Age,  $F(1,28) = 2.1$ ,  $p = 0.2$ ; see also  
257 **Supplementary Figure 1**).

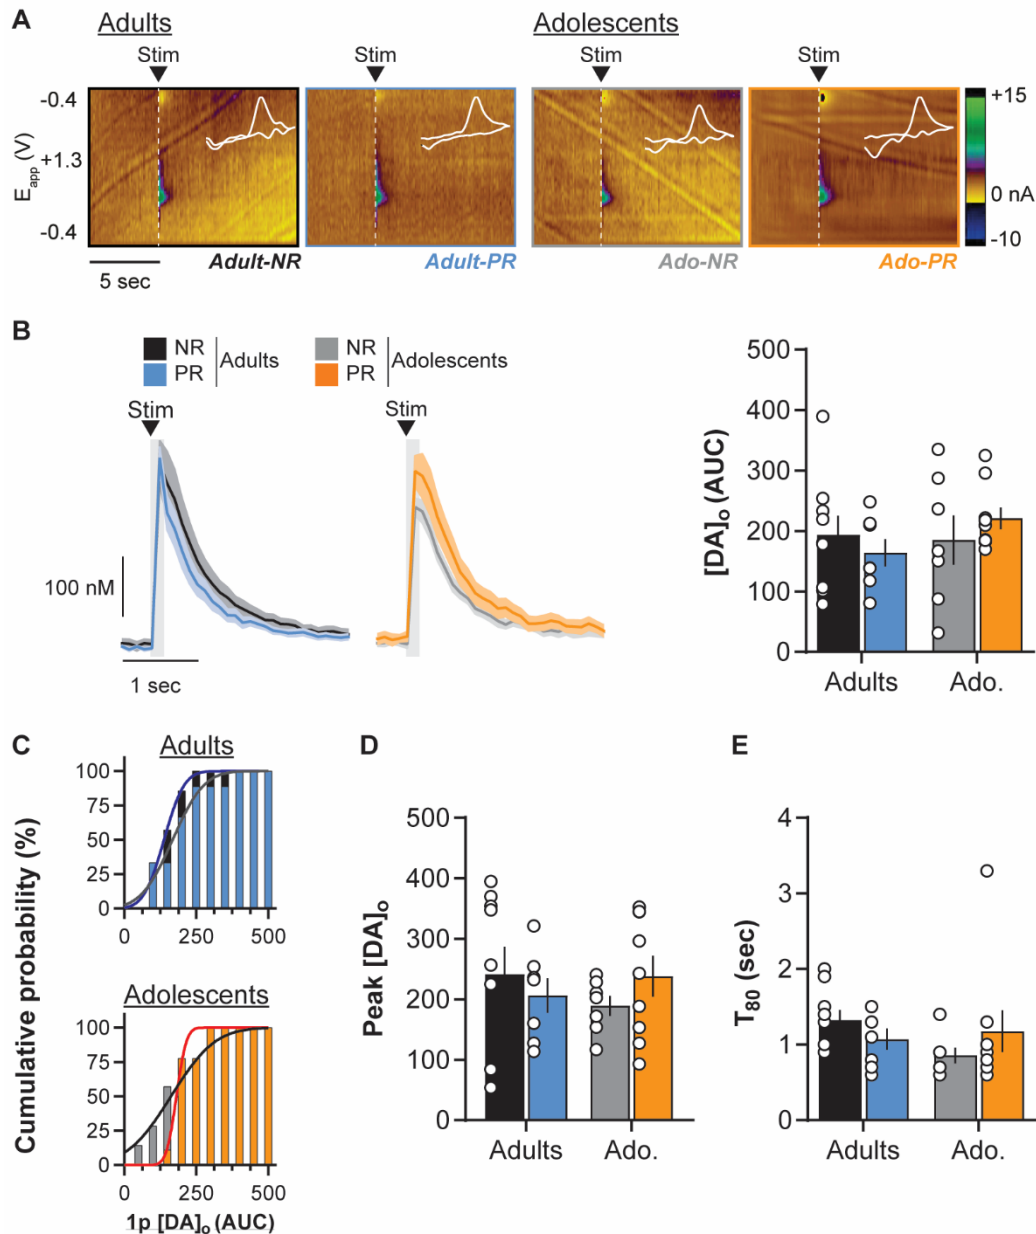

**Figure 4.** Age-dependent impact of protein restriction on dorsal striatum dopamine release evoked by single pulse. (A) Representative FSCV color plots for each diet group (non-restricted, NR; protein-restricted, PR) depicting current changes (color) over time (x-axis; in sec) as a function of the recording electrode holding potential (y-axis; -0.4 to +1.3 V and back) in response to single pulse electrical stimulation (0.7 mA, 0.2 ms; vertical white dashed lines). White line insets represent voltammograms for each color plot. (B) *Left:* Dorsal striatum [DA]<sub>0</sub> (in nM; mean ± SEM) in slices from adult and adolescent NR and PR rats, aligned to the single pulse electrical stimulation (black arrow); *Right:* [DA]<sub>0</sub> release (AUC) evoked by single pulse stimulation in the dorsal striatum. (C) Cumulative distribution of single pulse evoked dorsal striatum [DA]<sub>0</sub> AUC in adult (*top*) and adolescent (*bottom*) groups. (D) Mean [DA]<sub>0</sub> peak evoked by single pulse stimulation in the dorsal striatum. (E) Average T<sub>80</sub> (time for 80% decay from [DA]<sub>0</sub> peak) in the dorsal striatum. Adults-NR (black, n = 9), Adults-PR (blue, n = 7), Adolescents-NR (grey, n = 7) and Adolescents-PR (orange, n = 9). Bars show means ± SEM and circles show individual (e.g. recording site) data points.

258

259 Frequency-dependent striatal dopamine release

260 As previously observed in the NAc, striatal dopamine release increased as a function of the  
 261 stimulation frequency (**Figure 5A-B**; three-way repeated measures ANOVA: Frequency,



262  $F(3,84) = 13.06, p < 0.001$ ) similarly in both age groups (Age,  $F(1,28) = 1.5, p = 0.2$ ; Frequency  
 263  $\times$  Age,  $F(3, 84) = 2.1, p = 0.1$ ). However, first analyses suggested that protein restriction did  
 264 not significantly change dopamine release evoked by all frequencies tested (Diet,  $F(1,28) =$   
 265  $3.5, p = 0.07$ ; Diet  $\times$  Frequency,  $F(3,84) = 1.8, p = 0.1$ ; Diet  $\times$  Age,  $F(1,28) = 2.6, p = 0.1$ ; Diet  
 266  $\times$  Frequency  $\times$  Age,  $F(3,84) = 1.9, p = 0.1$ ).

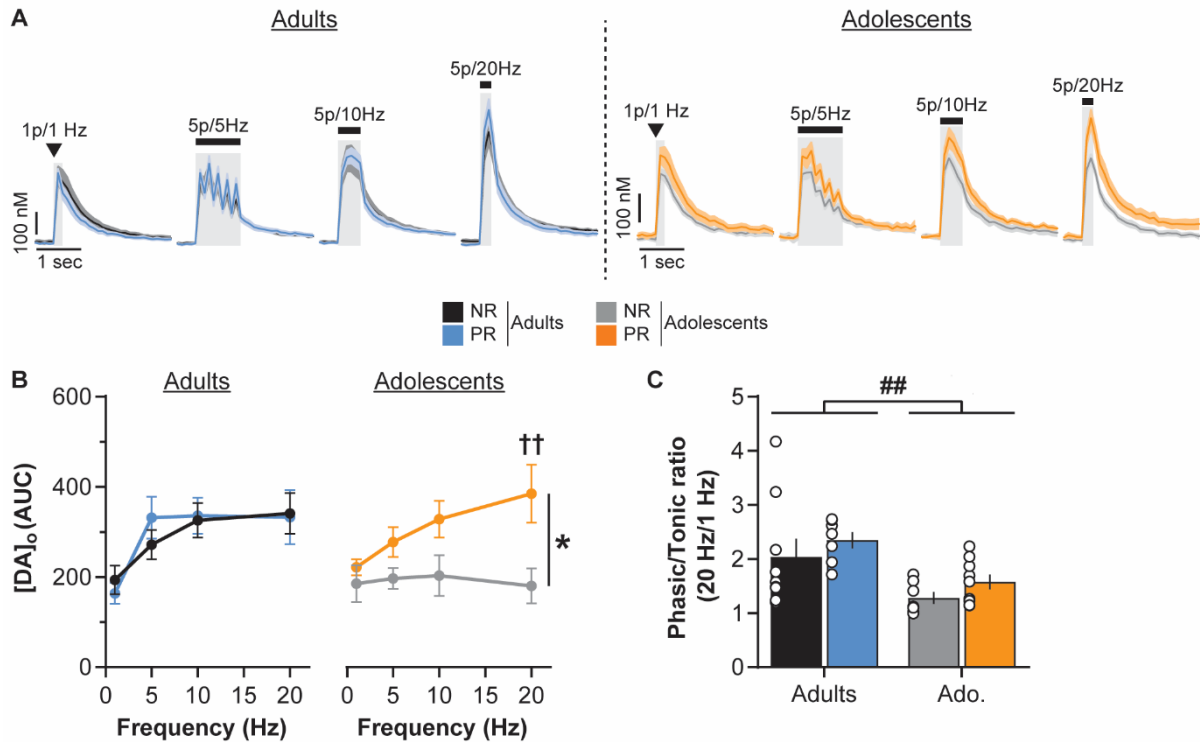

**Figure 5.** Age-dependent impact of protein restriction on frequency-dependent dorsal striatum dopamine release. (A) Dorsal striatum  $[DA]_0$  (in nM, mean  $\pm$  SEM) for each diet group (non-restricted, NR; protein-restricted, PR) aligned to the electrical stimulation (black symbol) at 1 Hz (single pulse), 5, 10 or 20 Hz (5 pulses; 0.7 mA, 0.2 ms). (B) Protein restriction at adulthood did not affect dorsal striatum dopamine release (AUC) in adults (left) but increased it in adolescent rats (right). (C) Protein restriction has no impact on  $[DA]_0$  phasic/tonic ratios. Adults-NR (black,  $n = 9$ ), Adults-PR (blue,  $n = 7$ ), Adolescents-NR (grey,  $n = 7$ ) and Adolescents-PR (orange,  $n = 9$ ). Bars show means  $\pm$  SEM and circles show individual (e.g. recording site) data points. \*  $p < 0.05$  Diet effect (two-way ANOVA followed by Sidak's *post hoc* tests), ††  $p < 0.01$  Frequency effect (two-way ANOVA followed by Dunnett's *post hoc* tests versus 1 Hz), ##  $p < 0.01$  Age effect (two-way ANOVA).

267

268 Separate analyses for each age group confirmed that protein restriction has no significant  
 269 effect on frequency-dependent striatal dopamine release in adults (two-way repeated  
 270 measures ANOVA: Diet,  $F(1,14) = 0.02, p = 0.9$ ; Frequency,  $F(3,42) = 26.6, p < 0.001$ ; Diet  $\times$   
 271 Frequency,  $F(3, 42) = 1.8, p = 0.2$ ). In contrast, protein restriction in adolescent rats  
 272 significantly increased stimulation-evoked striatal dopamine release (two-way repeated  
 273 measures ANOVA: Diet,  $F(1,14) = 8.7, p < 0.05$ ; Frequency,  $F(3,42) = 1.8, p = 0.2$ ; Diet  $\times$   
 274 Frequency,  $F(3, 42) = 1.9, p = 0.1$ ), especially in response to phasic-like stimulations (Sidak's  
 275 *post hoc* tests: 1-10 Hz all  $p > 0.1$ ; 20 Hz  $p < 0.01$ ). Moreover, the frequency-dependent  
 276 increase in dorsal striatum dopamine release is significantly observed in the adolescent PR  
 277 group (Dunnett's *post hoc* tests versus 1 Hz stimulation: 5 Hz,  $p = 0.5$ ; 10 Hz,  $p = 0.08$ ; 20 Hz,  
 278  $p < 0.01$ ) but not in the NR control group (5-20 Hz versus 1 Hz stimulation, all  $p > 0.9$ ). This

279 last result suggests that the nigrostriatal dopamine system may be sensitized by protein  
280 restriction during adolescence, despite an overall decrease in evoked release of dopamine.

281 Similar to what we observed in the NAc, the ‘phasic/tonic’ ratio of striatal dopamine release  
282 was lower in adolescent slices (**Figure 5C**; Two-way ANOVA: Age,  $F(1,28) = 11.7$ ,  $p < 0.01$ )  
283 but was not altered by protein restriction (Diet,  $F(1,28) = 1.8$ ,  $p = 0.2$ ; Age x Diet,  $F(1,28) =$   
284  $0.001$ ,  $p = 1.0$ ).

285

## 286 **DISCUSSION**

287 Protein homeostasis is a crucial physiological function for almost all species throughout the  
288 lifespan. Despite the deleterious consequences of protein restriction on a multitude of  
289 physiological functions, the neurobiological impact of such a diet at different ages remains  
290 largely unexplored. The present study reveals that protein restriction affects the function of the  
291 mesolimbic and nigrostriatal dopamine pathways. More importantly, our results demonstrate  
292 that these effects are dependent on the age at which protein restriction is experienced,  
293 highlighting adolescence as a vulnerability window for the deleterious effects of an unbalanced  
294 diet.

295 The impact of protein restriction on weight is highly dependent on the degree of restriction and  
296 the physiological state of the animal [9,10,55]. When performed at adulthood, protein  
297 restriction did not affect rats’ weight, consistent with our previous results [11]. Moreover, adult  
298 rats slightly increased their daily energy intake relative to their body weight. In adults, this  
299 increase may explain the absence of effect on weight as rats attempt to compensate protein  
300 deficiency with a general hyperphagia [11]. An alternative explanation is that low protein diet  
301 may change energy expenditure, as previously observed [67]. In contrast, protein restriction  
302 during adolescence significantly limits animals’ normal trajectory of weight gain. As for adults,  
303 adolescent PR rats increased their daily energy intake compared to the control NR group.  
304 Adolescent animals are rapidly growing and have higher protein requirements than adults [55].  
305 Surprisingly, this change in food intake behavior did not seem to be sufficient to support normal  
306 growth. In the present study, the low protein diet (5% protein from casein) was the only source  
307 of nutrients. Breakdown analysis of macronutrient intake revealed that the important protein  
308 deficiency observed in PR groups is associated with an indirect increase in carbohydrate and  
309 fat intake contained in animal food. The regulation of protein appetite and the balance between  
310 protein intake and other macronutrients is still poorly understood but several studies suggest  
311 that numerous species regulate their food-related behaviors to avoid protein deficiency [8–10],  
312 which may lead to the overconsumption of other nutrients. It remains intriguing, however, that  
313 in this case adolescent PR rats did not exhibit a larger increase of their food intake. As both



314 the overconsumption of sweet or fat diets may impact the functioning of the dopamine system  
315 especially during development [43–47], we cannot exclude that the diet impact reported here  
316 may be the result of the combination of protein deficiency and concurrent changes in  
317 carbohydrate and fat intake.

318 The two main dopamine projections to the NAc and the dorsal striatum are involved in various  
319 food-related processes including incentive salience [16] and prediction error [66], using taste  
320 and nutritional (post-ingestive) values of food [23–28]. Here, we observed that protein  
321 restriction differentially affected projection-specific dopamine release depending on age of diet  
322 exposure. At adulthood, protein restriction increased NAc dopamine release but had no effect  
323 on dorsal striatum dopamine release. Tonic and phasic dopamine firing and release convey  
324 different information about motivational and learning processes [16,19,23,66,68]. In the  
325 mesolimbic pathway, PR diet at adulthood increased both responses to low ‘tonic’ and high  
326 ‘phasic’ stimulations but did not alter the phasic/tonic ratio, suggesting a more general  
327 increase in the capacity of terminals for dopamine release rather than an change in the  
328 contrast between different dopamine signaling modes [59,69]. Such global sensitization of the  
329 mesolimbic pathway may profoundly alter motivated behaviors like food preferences [11,13],  
330 and increase the rewarding properties of protein-enriched food in restricted/deprived animals  
331 [12].

332 Protein restriction during adolescence had a broader impact on the function of dopamine  
333 terminals, relative to the same diet during adulthood. In contrast to what we observed at  
334 adulthood, protein restriction in adolescents decreased NAc dopamine release both in  
335 response to single pulse stimulation, low frequency pulse trains (5-10 Hz) and high frequency  
336 burst-like stimulation (5p at 20 Hz). Dopamine neurons exhibit an elevated firing rate during  
337 adolescence [50,53,54] associated with changes in dopamine availability in dopamine  
338 projection targets [48,49,51]. Based on this and our first results showing an effect of protein  
339 restriction at adulthood on NAc dopamine release, we might have expected an enhancement  
340 of the diet effect during adolescence. One way to reconcile these opposite findings is to  
341 consider that the degree of protein restriction in adolescent rats may be more profound than  
342 in adults. As discussed earlier, we observed a substantial impact of protein restriction on  
343 weight gain in protein-restricted adolescents (and not in adults) suggesting a more severe  
344 level of restriction. As dietary protein is a major source of amino acids (e.g. tyrosine) required  
345 for catecholaminergic metabolism (synthesis, release, enzymatic activity), one hypothesis is  
346 that a greater protein deficiency in adolescent rats than adults will affect average dopamine  
347 levels and the ability to synthesize and release dopamine. Accordingly, previous studies have  
348 reported a decrease in dopamine in several brain regions in response to pre- or perinatal  
349 protein malnutrition as well as an hypo-responsivity to psychostimulants (see [5] for review).

350 In the dorsal striatum in adolescents, we observed an opposite pattern compared to the NAc.  
351 As such, evoked dopamine release was increased after adolescent protein restriction,  
352 especially at high stimulation frequencies. Such an effect partially rules out the hypothesis of  
353 a global amino acid deficiency. However, the nigrostriatal dopamine pathway matures earlier  
354 than other dopamine pathways [48] and may then be less sensitive to protein restriction.  
355 Striatal and NAc dopamine pathways are involved in different aspects of food-related  
356 processes and recent advances demonstrated that striatal, but not NAc, dopamine signaling  
357 is involved in encoding the nutritional value of food [70]. The increase in evoked dopamine  
358 release in striatal areas only seen in adolescent-exposed rats reported in the present study  
359 may support a nutrition-seeking response to the elevated protein requirement at this age.

360 The effect of protein restriction at adulthood or during adolescence on dopamine pathways  
361 may also involve regulation of dopamine terminal activity by reuptake processes or local  
362 striatal microcircuits [65,69]. Dopamine reuptake activity may be changed by specific diets  
363 [39,40]. Here, we did not observe any significant change induced by protein restriction on  
364 dopamine clearance in response to single pulse stimulations. Combined with the absence of  
365 significant diet effects on the  $[DA]_0$  peak amplitudes, this suggests that neither protein  
366 restriction during adolescence nor adulthood impacts dopamine transporter functioning.  
367 However, we cannot totally exclude reuptake changes as we observed diet-dependent  
368 changes in evoked dopamine release quantified by AUC. The AUC could vary because of  
369 changes in either dopamine release or reuptake. On the other hand, striatal microcircuits also  
370 mature during adolescence [75,76] and may be sensitive to different diet effects. These issues  
371 and the behavioral consequences of dietary protein alterations on the dopamine system  
372 remain to be investigated.

373 The direct influence of protein or amino acids levels on dopamine neurons is still unexplored,  
374 however, these neurons receive input from hypothalamic regions which are able to detect  
375 amino acids [10,14]. Protein restriction also induces a broad metabolic response involving  
376 peripheral food-related signals to which dopamine neurons are directly sensitive [31–35].  
377 Dopamine release is especially sensitive to insulin through its actions at specific receptors  
378 located both directly on dopamine neurons [77] and on striatal cholinergic neurons [37]. The  
379 effects of insulin on the dopamine system and dopamine-related behaviors are complex and  
380 depend on insulin concentration, brain region, cell type and the current physiological state  
381 [40,78]. Protein restriction is known to increase insulin sensitivity and glucose metabolism  
382 [13,79], which may then modulate dopamine's neurobiological and behavioral functions. The  
383 interaction of the dopamine and insulin systems in response to different diets differing in  
384 protein content warrants further *ex vivo* and *in vivo* investigation.

385 In conclusion, our study provides evidence that prolonged protein restriction has an important  
386 impact on function of dopamine terminals in the NAc and dorsal striatum. More importantly we  
387 highlight the increased sensitivity of the dopamine system during adolescence to the  
388 deleterious effects of a diet that is inadequate in protein. Adolescence is characterized by  
389 important maturation events within dopamine circuitry and dopamine-related processes [48–  
390 52,54] and numerous studies have now demonstrated that adolescence is an important  
391 vulnerability window for diet-related alterations of cognitive and neurobiological functions [43–  
392 47]. How protein restriction during adolescence may have different, and potentially long-term,  
393 impacts on dopamine-related behaviors considering its opposite effects on the mesolimbic  
394 and nigrostriatal pathways, remains to be investigated. Given the role of malnutrition and  
395 inadequate protein intake on neurodevelopmental psychiatric disorders [5,6] involving  
396 alterations of the dopamine system [17,80,81] and having their onset during adolescence  
397 [36,82], our current findings also represent a step towards a better understanding of the  
398 mechanisms regulating protein appetite, protein malnutrition, and the emergence of  
399 dopamine-related disorders.

400

#### 401 **FUNDING AND DISCLOSURE**

402 This work was supported by the Biotechnology and Biological Sciences Research Council  
403 [grant # BB/M007391/1 to J.E.M.], the European Commission [grant # GA 631404 to J.E.M.],  
404 The Leverhulme Trust [grant # RPG-2017-417 to J.E.M.] and the Tromsø Research  
405 Foundation [grant # 19-SG-JMcC to J. E. M.]. The authors declare no conflict of interest.

406

#### 407 **ACKNOWLEDGEMENTS**

408 The authors would like to acknowledge the help and support from the staff of the Division of  
409 Biomedical Services, Preclinical Research Facility, University of Leicester, for technical  
410 support and the care of experimental animals.

411

#### 412 **AUTHOR CONTRIBUTIONS**

413 FN, KZP and JEM designed research; FN performed research, FN, KZP, AMJY and JEM  
414 analyzed data; FN, KZP, AMJY and JEM wrote the manuscript.

415

## 416 REFERENCES

- 417 1. Berthoud H-R, Münzberg H, Richards BK, Morrison CD. Neural and metabolic  
418 regulation of macronutrient intake and selection. *Proc Nutr Soc.* 2012;71:390–400.
- 419 2. Simpson SJ, Raubenheimer D. Obesity: the protein leverage hypothesis. *Obes Rev.*  
420 2005;6:133–142.
- 421 3. Hall KD. The Potential Role of Protein Leverage in the US Obesity Epidemic. *Obesity*  
422 (Silver Spring). 2019;27:1222–1224.
- 423 4. Raubenheimer D, Simpson SJ. Protein Leverage: Theoretical Foundations and Ten  
424 Points of Clarification. *Obesity (Silver Spring).* 2019;27:1225–1238.
- 425 5. Alamy M, Bengelloun WA. Malnutrition and brain development: an analysis of the  
426 effects of inadequate diet during different stages of life in rat. *Neurosci Biobehav Rev.*  
427 2012;36:1463–1480.
- 428 6. Grissom NM, Reyes TM. Gestational overgrowth and undergrowth affect  
429 neurodevelopment: similarities and differences from behavior to epigenetics. *Int J Dev*  
430 *Neurosci.* 2013;31:406–414.
- 431 7. Gould JM, Smith PJ, Airey CJ, Mort EJ, Airey LE, Warricker FDM, et al. Mouse  
432 maternal protein restriction during preimplantation alone permanently alters brain  
433 neuron proportion and adult short-term memory. *Proc Natl Acad Sci USA.*  
434 2018;115:E7398–E7407.
- 435 8. Theall CL, Wurtman JJ, Wurtman RJ. Self-selection and regulation of protein:  
436 carbohydrate ratio in foods adult rats eat. *J Nutr.* 1984;114:711–718.
- 437 9. Morrison CD, Reed SD, Henagan TM. Homeostatic regulation of protein intake: in  
438 search of a mechanism. *Am J Physiol Regul Integr Comp Physiol.* 2012;302:R917-928.
- 439 10. Morrison CD, Laeger T. Protein-dependent regulation of feeding and metabolism.  
440 *Trends Endocrinol Metab.* 2015;26:256–262.
- 441 11. Murphy M, Peters KZ, Denton BS, Lee KA, Chadchankar H, McCutcheon JE.  
442 Restriction of dietary protein leads to conditioned protein preference and elevated  
443 palatability of protein-containing food in rats. *Physiol Behav.* 2018;184:235–241.
- 444 12. Naneix F, Peters KZ, McCutcheon JE. Investigating the Effect of Physiological Need  
445 States on Palatability and Motivation Using Microstructural Analysis of Licking.  
446 *Neuroscience.* 2019. 1 November 2019.  
447 <https://doi.org/10.1016/j.neuroscience.2019.10.036>.
- 448 13. Hill CM, Laeger T, Dehner M, Albarado DC, Clarke B, Wanders D, et al. FGF21 Signals  
449 Protein Status to the Brain and Adaptively Regulates Food Choice and Metabolism.  
450 *Cell Rep.* 2019;27:2934-2947.e3.
- 451 14. Heeley N, Blouet C. Central Amino Acid Sensing in the Control of Feeding Behavior.  
452 *Front Endocrinol (Lausanne).* 2016;7:148.
- 453 15. von Holstein-Rathlou S, BonDurant LD, Peltekian L, Naber MC, Yin TC, Claflin KE, et  
454 al. FGF21 Mediates Endocrine Control of Simple Sugar Intake and Sweet Taste  
455 Preference by the Liver. *Cell Metab.* 2016;23:335–343.
- 456 16. Berridge KC. The debate over dopamine's role in reward: the case for incentive  
457 salience. *Psychopharmacology (Berl).* 2007;191:391–431.
- 458 17. Volkow ND, Wang G-J, Baler RD. Reward, dopamine and the control of food intake:  
459 implications for obesity. *Trends Cogn Sci (Regul Ed).* 2011;15:37–46.
- 460 18. Liu CM, Kanoski SE. Homeostatic and non-homeostatic controls of feeding behavior:  
461 Distinct vs. common neural systems. *Physiol Behav.* 2018;193:223–231.
- 462 19. Saunders BT, Richard JM, Margolis EB, Janak PH. Dopamine neurons create  
463 Pavlovian conditioned stimuli with circuit-defined motivational properties. *Nat Neurosci.*  
464 2018;21:1072–1083.
- 465 20. McCutcheon JE. The role of dopamine in the pursuit of nutritional value. *Physiol Behav.*  
466 2015;152:408–415.

- 467 21. Aitken TJ, Greenfield VY, Wassum KM. Nucleus accumbens core dopamine signaling  
468 tracks the need-based motivational value of food-paired cues. *J Neurochem.*  
469 2016;136:1026–1036.
- 470 22. Papageorgiou GK, Baudonnat M, Cucca F, Walton ME. Mesolimbic Dopamine  
471 Encodes Prediction Errors in a State-Dependent Manner. *Cell Rep.* 2016;15:221–228.
- 472 23. Hsu TM, McCutcheon JE, Roitman MF. Parallels and Overlap: The Integration of  
473 Homeostatic Signals by Mesolimbic Dopamine Neurons. *Front Psychiatry.* 2018;9:410.
- 474 24. de Araujo IE, Ren X, Ferreira JG. Metabolic sensing in brain dopamine systems.  
475 *Results Probl Cell Differ.* 2010;52:69–86.
- 476 25. Domingos AI, Vaynshteyn J, Voss HU, Ren X, Gradinaru V, Zang F, et al. Leptin  
477 regulates the reward value of nutrient. *Nat Neurosci.* 2011;14:1562–1568.
- 478 26. Beeler JA, McCutcheon JE, Cao ZFH, Murakami M, Alexander E, Roitman MF, et al.  
479 Taste uncoupled from nutrition fails to sustain the reinforcing properties of food. *Eur J*  
480 *Neurosci.* 2012;36:2533–2546.
- 481 27. McCutcheon JE, Beeler JA, Roitman MF. Sucrose-predictive cues evoke greater  
482 phasic dopamine release than saccharin-predictive cues. *Synapse.* 2012;66:346–351.
- 483 28. Alhadeff AL, Goldstein N, Park O, Klima ML, Vargas A, Betley JN. Natural and Drug  
484 Rewards Engage Distinct Pathways that Converge on Coordinated Hypothalamic and  
485 Reward Circuits. *Neuron.* 2019;103:891-908.e6.
- 486 29. Sclafani A, Touzani K, Bodnar RJ. Dopamine and learned food preferences. *Physiol*  
487 *Behav.* 2011;104:64–68.
- 488 30. Han W, Tellez LA, Perkins MH, Perez IO, Qu T, Ferreira J, et al. A Neural Circuit for  
489 Gut-Induced Reward. *Cell.* 2018;175:665-678.e23.
- 490 31. Fulton S, Pissios P, Manchon RP, Stiles L, Frank L, Pothos EN, et al. Leptin regulation  
491 of the mesoaccumbens dopamine pathway. *Neuron.* 2006;51:811–822.
- 492 32. Hommel JD, Trinko R, Sears RM, Georgescu D, Liu Z-W, Gao X-B, et al. Leptin  
493 receptor signaling in midbrain dopamine neurons regulates feeding. *Neuron.*  
494 2006;51:801–810.
- 495 33. Cone JJ, McCutcheon JE, Roitman MF. Ghrelin acts as an interface between  
496 physiological state and phasic dopamine signaling. *J Neurosci.* 2014;34:4905–4913.
- 497 34. Miettlicki-Baase EG, Ortinski PI, Reiner DJ, Sinon CG, McCutcheon JE, Pierce RC, et  
498 al. Glucagon-like peptide-1 receptor activation in the nucleus accumbens core  
499 suppresses feeding by increasing glutamatergic AMPA/kainate signaling. *J Neurosci.*  
500 2014;34:6985–6992.
- 501 35. Liu S, Borgland SL. Regulation of the mesolimbic dopamine circuit by feeding peptides.  
502 *Neuroscience.* 2015;289:19–42.
- 503 36. Avena NM, Rada P, Hoebel BG. Evidence for sugar addiction: behavioral and  
504 neurochemical effects of intermittent, excessive sugar intake. *Neurosci Biobehav Rev.*  
505 2008;32:20–39.
- 506 37. Stouffer MA, Woods CA, Patel JC, Lee CR, Witkovsky P, Bao L, et al. Insulin enhances  
507 striatal dopamine release by activating cholinergic interneurons and thereby signals  
508 reward. *Nat Commun.* 2015;6:8543.
- 509 38. Décarie-Spain L, Hryhorczuk C, Fulton S. Dopamine signalling adaptations by  
510 prolonged high-fat feeding. *Current Opinion in Behavioral Sciences.* 2016;9:136–143.
- 511 39. Fordahl SC, Locke JL, Jones SR. High fat diet augments amphetamine sensitization in  
512 mice: Role of feeding pattern, obesity, and dopamine terminal changes.  
513 *Neuropharmacology.* 2016;109:170–182.
- 514 40. Fordahl SC, Jones SR. High-Fat-Diet-Induced Deficits in Dopamine Terminal Function  
515 Are Reversed by Restoring Insulin Signaling. *ACS Chem Neurosci.* 2017;8:290–299.
- 516 41. Naef L, Moquin L, Dal Bo G, Giros B, Gratton A, Walker C-D. Maternal high-fat intake  
517 alters presynaptic regulation of dopamine in the nucleus accumbens and increases  
518 motivation for fat rewards in the offspring. *Neuroscience.* 2011;176:225–236.
- 519 42. Grissom NM, Herdt CT, Desilets J, Lidsky-Everson J, Reyes TM. Dissociable deficits of  
520 executive function caused by gestational adversity are linked to specific transcriptional  
521 changes in the prefrontal cortex. *Neuropsychopharmacology.* 2015;40:1353–1363.



- 522 43. Naneix F, Darlot F, Coutureau E, Cador M. Long-lasting deficits in hedonic and nucleus  
523 accumbens reactivity to sweet rewards by sugar overconsumption during adolescence.  
524 *Eur J Neurosci*. 2016;43:671–680.
- 525 44. Naneix F, Tantot F, Glangetas C, Kaufling J, Janthakhin Y, Boitard C, et al. Impact of  
526 Early Consumption of High-Fat Diet on the Mesolimbic Dopaminergic System. *ENeuro*.  
527 2017;4.
- 528 45. Naneix F, Darlot F, De Smedt-Peyrusse V, Pape JR, Coutureau E, Cador M. Protracted  
529 motivational dopamine-related deficits following adolescence sugar overconsumption.  
530 *Neuropharmacology*. 2018;129:16–25.
- 531 46. Noble EE, Kanoski SE. Early life exposure to obesogenic diets and learning and  
532 memory dysfunction. *Current Opinion in Behavioral Sciences*. 2016;9:7–14.
- 533 47. Reichelt AC. Adolescent Maturation Transitions in the Prefrontal Cortex and  
534 Dopamine Signaling as a Risk Factor for the Development of Obesity and High  
535 Fat/High Sugar Diet Induced Cognitive Deficits. *Front Behav Neurosci*. 2016;10:189.
- 536 48. Spear LP. The adolescent brain and age-related behavioral manifestations. *Neurosci*  
537 *Biobehav Rev*. 2000;24:417–463.
- 538 49. Andersen SL. Trajectories of brain development: point of vulnerability or window of  
539 opportunity? *Neurosci Biobehav Rev*. 2003;27:3–18.
- 540 50. McCutcheon JE, Conrad KL, Carr SB, Ford KA, McGehee DS, Marinelli M. Dopamine  
541 neurons in the ventral tegmental area fire faster in adolescent rats than in adults. *J*  
542 *Neurophysiol*. 2012;108:1620–1630.
- 543 51. Naneix F, Marchand AR, Di Scala G, Pape J-R, Coutureau E. Parallel maturation of  
544 goal-directed behavior and dopaminergic systems during adolescence. *J Neurosci*.  
545 2012;32:16223–16232.
- 546 52. Naneix F, Marchand AR, Pichon A, Pape J-R, Coutureau E. Adolescent stimulation of  
547 D2 receptors alters the maturation of dopamine-dependent goal-directed behavior.  
548 *Neuropsychopharmacology*. 2013;38:1566–1574.
- 549 53. McCutcheon JE, Marinelli M. Age matters. *Eur J Neurosci*. 2009;29:997–1014.
- 550 54. Marinelli M, McCutcheon JE. Heterogeneity of dopamine neuron activity across traits  
551 and states. *Neuroscience*. 2014;282:176–197.
- 552 55. White BD, Porter MH, Martin RJ. Effects of age on the feeding response to moderately  
553 low dietary protein in rats. *Physiol Behav*. 2000;68:673–681.
- 554 56. Fortin SM, Cone JJ, Ng-Evans S, McCutcheon JE, Roitman MF. Sampling phasic  
555 dopamine signaling with fast-scan cyclic voltammetry in awake, behaving rats. *Curr*  
556 *Protoc Neurosci*. 2015;70:7.25.1-7.25.20.
- 557 57. Mauterer M, Estave P, Holleran K, Jones S. Measurement of Dopamine Using Fast  
558 Scan Cyclic Voltammetry in Rodent Brain Slices. *BIO-PROTOCOL*. 2018;8.
- 559 58. Heien MLAV, Johnson MA, Wightman RM. Resolving neurotransmitters detected by  
560 fast-scan cyclic voltammetry. *Anal Chem*. 2004;76:5697–5704.
- 561 59. Rice ME, Cragg SJ. Nicotine amplifies reward-related dopamine signals in striatum. *Nat*  
562 *Neurosci*. 2004;7:583–584.
- 563 60. Grace AA, Bunney BS. Intracellular and extracellular electrophysiology of nigral  
564 dopaminergic neurons--1. Identification and characterization. *Neuroscience*.  
565 1983;10:301–315.
- 566 61. Hyland BI, Reynolds JNJ, Hay J, Perk CG, Miller R. Firing modes of midbrain dopamine  
567 cells in the freely moving rat. *Neuroscience*. 2002;114:475–492.
- 568 62. Grace AA, Floresco SB, Goto Y, Lodge DJ. Regulation of firing of dopaminergic  
569 neurons and control of goal-directed behaviors. *Trends Neurosci*. 2007;30:220–227.
- 570 63. Yavas E, Young AMJ. N-Methyl-d-aspartate Modulation of Nucleus Accumbens  
571 Dopamine Release by Metabotropic Glutamate Receptors: Fast Cyclic Voltammetry  
572 Studies in Rat Brain Slices in Vitro. *ACS Chem Neurosci*. 2017;8:320–328.
- 573 64. Sinkala E, McCutcheon JE, Schuck MJ, Schmidt E, Roitman MF, Eddington DT.  
574 Electrode calibration with a microfluidic flow cell for fast-scan cyclic voltammetry. *Lab*  
575 *Chip*. 2012;12:2403–2408.

- 576 65. Goto Y, Grace AA. Limbic and cortical information processing in the nucleus  
577 accumbens. *Trends Neurosci.* 2008;31:552–558.
- 578 66. Schultz W. Multiple dopamine functions at different time courses. *Annu Rev Neurosci.*  
579 2007;30:259–288.
- 580 67. Rothwell NJ, Stock MJ, Tyzbir RS. Mechanisms of thermogenesis induced by low  
581 protein diets. *Metab Clin Exp.* 1983;32:257–261.
- 582 68. Day JJ, Roitman MF, Wightman RM, Carelli RM. Associative learning mediates  
583 dynamic shifts in dopamine signaling in the nucleus accumbens. *Nat Neurosci.*  
584 2007;10:1020–1028.
- 585 69. Rice ME, Patel JC, Cragg SJ. Dopamine release in the basal ganglia. *Neuroscience.*  
586 2011;198:112–137.
- 587 70. Tellez LA, Han W, Zhang X, Ferreira TL, Perez IO, Shammah-Lagnado SJ, et al.  
588 Separate circuitries encode the hedonic and nutritional values of sugar. *Nat Neurosci.*  
589 2016;19:465–470.
- 590 71. Matthews M, Bondi C, Torres G, Moghaddam B. Reduced presynaptic dopamine  
591 activity in adolescent dorsal striatum. *Neuropsychopharmacology.* 2013;38:1344–1351.
- 592 72. Pitts EG, Stowe TA, Christensen B, Ferris MJ. Comparing dopamine release, uptake,  
593 and D2 autoreceptor function across the ventromedial to dorsolateral striatum in  
594 adolescent and adult rats. *BioRxiv.* 2019:806638.
- 595 73. Coulter CL, Happe HK, Murrin LC. Postnatal development of the dopamine transporter:  
596 a quantitative autoradiographic study. *Brain Res Dev Brain Res.* 1996;92:172–181.
- 597 74. Lieberman OJ, McGuirt AF, Mosharov EV, Pigulevskiy I, Hobson BD, Choi S, et al.  
598 Dopamine Triggers the Maturation of Striatal Spiny Projection Neuron Excitability  
599 during a Critical Period. *Neuron.* 2018;99:540-554.e4.
- 600 75. Brenhouse HC, Sonntag KC, Andersen SL. Transient D1 dopamine receptor  
601 expression on prefrontal cortex projection neurons: relationship to enhanced  
602 motivational salience of drug cues in adolescence. *J Neurosci.* 2008;28:2375–2382.
- 603 76. Doura MB, Gold AB, Keller AB, Perry DC. Adult and periadolescent rats differ in  
604 expression of nicotinic cholinergic receptor subtypes and in the response of these  
605 subtypes to chronic nicotine exposure. *Brain Res.* 2008;1215:40–52.
- 606 77. Labouèbe G, Liu S, Dias C, Zou H, Wong JCY, Karunakaran S, et al. Insulin induces  
607 long-term depression of ventral tegmental area dopamine neurons via  
608 endocannabinoids. *Nat Neurosci.* 2013;16:300–308.
- 609 78. Liu S, Borgland SL. Insulin actions in the mesolimbic dopamine system. *Exp Neurol.*  
610 2019;320:113006.
- 611 79. Fontana L, Cummings NE, Arriola Apelo SI, Neuman JC, Kasza I, Schmidt BA, et al.  
612 Decreased Consumption of Branched-Chain Amino Acids Improves Metabolic Health.  
613 *Cell Rep.* 2016;16:520–530.
- 614 80. Kenny PJ. Common cellular and molecular mechanisms in obesity and drug addiction.  
615 *Nat Rev Neurosci.* 2011;12:638–651.
- 616 81. Naef L, Pitman KA, Borgland SL. Mesolimbic dopamine and its neuromodulators in  
617 obesity and binge eating. *CNS Spectrums.* 2015;20:574–583.
- 618 82. Paus T, Keshavan M, Giedd JN. Why do many psychiatric disorders emerge during  
619 adolescence? *Nat Rev Neurosci.* 2008;9:947–957.
- 620 83. Paxinos G, Watson C. *The Rat brain in Stereotaxic Coordinates.* 6th ed. Elsevier; 2007.  
621



## SUPPLEMENTARY INFORMATION

**Supplementary Table 1.** Macronutrient composition of the control chow and protein restricted diet.

|                     | Control chow diet<br>(Teklad global #2918) |          | Protein restricted diet<br>(Research Diet D15100602) |          |
|---------------------|--------------------------------------------|----------|------------------------------------------------------|----------|
|                     | g (%)                                      | kcal (%) | g (%)                                                | kcal (%) |
| <b>Protein</b>      | 18                                         | 24       | 5                                                    | 4        |
| <b>Carbohydrate</b> | 62                                         | 58       | 76                                                   | 74       |
| <b>Fat</b>          | 7                                          | 18       | 10                                                   | 22       |

**Supplementary Table 2.** Macronutrient breakdown of average daily food intake per cage (in g) or normalized to rats' body weight (g/kg body weight) for each diet condition.

|                    | Rats<br>(Cages) | Total food<br>(per cage) | Macronutrient |              |            |                  |
|--------------------|-----------------|--------------------------|---------------|--------------|------------|------------------|
|                    |                 |                          | Protein       | Carbohydrate | Fat        |                  |
| <b>Adults</b>      | <b>NR</b>       | 27.7 ± 0.7               | 5.1 ± 0.1     | 17.3 ± 0.4   | 1.9 ± 0.1  | g                |
|                    |                 | 69.7 ± 2.7               | 13.0 ± 0.5    | 43.5 ± 1.7   | 5.0 ± 0.2  | g/kg body weight |
|                    | <b>PR</b>       | 28.7 ± 0.4               | 1.4 ± 0.02    | 21.8 ± 0.3   | 2.9 ± 0.04 | g                |
|                    |                 | 69.9 ± 2.7               | 3.5 ± 0.1     | 53.1 ± 2.0   | 7.0 ± 0.3  | g/kg body weight |
| <b>Adolescents</b> | <b>NR</b>       | 22.7 ± 0.8               | 4.2 ± 0.1     | 14.2 ± 0.5   | 1.6 ± 0.05 | g                |
|                    |                 | 130.1 ± 3.0              | 24.2 ± 0.6    | 81.2 ± 1.9   | 9.4 ± 0.2  | g/kg body weight |
|                    | <b>PR</b>       | 14.5 ± 1.7               | 0.7 ± 0.08    | 11.0 ± 1.3   | 1.4 ± 0.2  | g                |
|                    |                 | 117.8 ± 9.4              | 5.9 ± 0.3     | 89.5 ± 4.1   | 11.8 ± 0.5 | g/kg body weight |

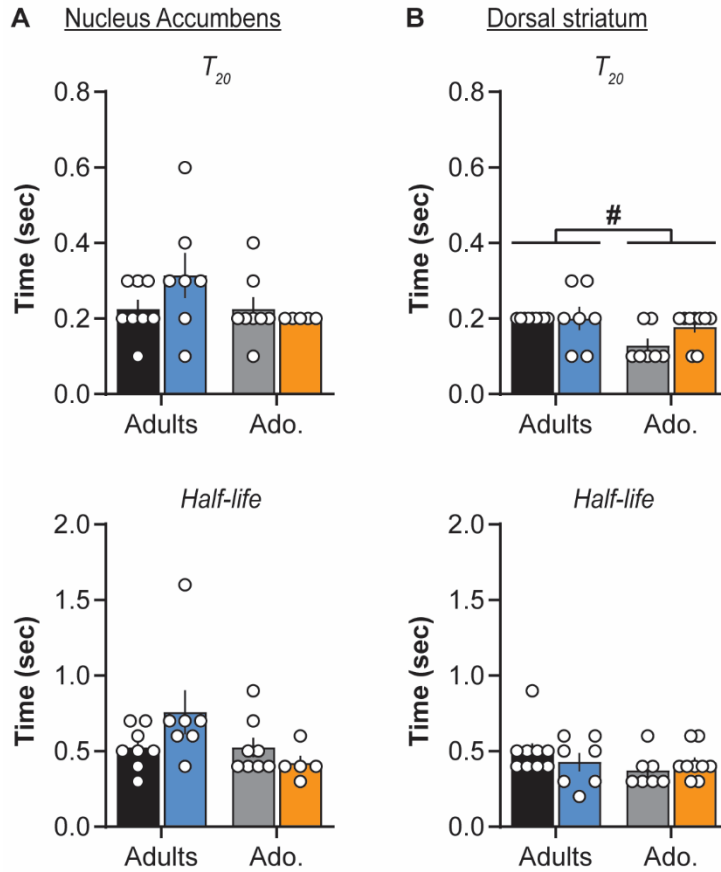

**Supplementary Figure 1.** Protein restriction at adulthood or during adolescence did not change dopamine clearance parameters ( $T_{20}$ : time for 20% decay from  $[DA]_0$  peak; Half-life: time for 50% decay from  $[DA]_0$  peak) after single pulse stimulation in the NAc (A;  $T_{20}$  Age  $F(1,24) = 2.2, p = 0.2$ ; Diet  $F(1,24) = 0.7, p = 0.4$ ; Age x Diet  $F(1,24) = 2.2, p = 0.2$  / Half-life Age  $F(1,24) = 3.5, p = 0.07$ ; Diet  $F(1,24) = 0.5, p = 0.5$ ; Age x Diet  $F(1,24) = 3.5, p = 0.07$ ) or in the dorsal striatum (B;  $T_{20}$  Age  $F(1,28) = 6.9, p < 0.05$ ; Diet  $F(1,28) = 1.9, p = 0.2$ ; Age x Diet  $F(1,28) = 1.9, p = 0.2$  / Half-life Age  $F(1,28) = 1.9, p = 0.2$ ; Diet  $F(1,28) = 0.04, p = 0.8$ ; Age x Diet  $F(1,28) = 1.6, p = 0.2$ ). Adults-NR (black), Adults-PR (blue), Adolescents-NR (grey) and Adolescents-PR (orange). Bars show mean  $\pm$  SEM and circles show individual (e.g. recording site) data points. #  $p < 0.05$  Age effect (two-way ANOVA)
